# Supplementary material for: Mitochondrial translation inhibition triggers ATF4 activation, leading to integrated stress response but not to mitochondrial unfolded protein response
Source: PubMed Central journal article supplement (PMC7685009; doi:10.1042/bsr20201289), 2020-11-24
Supplement: BSR-2020-1289_supp.pdf [file BSR-2020-1289_supp.pdf]

### Supporting information Table 1

Primer sequence: The sequences of the qRT-PCR primers are as follows

| Primer  | Forward (5' - 3')     | Reverse (5' - 3')    |
|---------|-----------------------|----------------------|
| Gdf15   | cttgaagacttgggctggag  | taagaaccaccggggtgtag |
| Fgf21   | gggaggatggaacagtggta  | gtcctccagcagcagttctc |
| Cdsn    | cctcctcgtcttttctggf   | tggttctcaggcgatggatt |
| Trib3   | gctgtgggattcaagccaaa  | ctgtgggcctgggtactaaa |
| Atf3    | aactggcttctgtgcactt   | ggccagctaggtcatctgag |
| Slc7a5  | cacctgccttctgtctctc   | tgaatcggagccacatcata |
| Sesn2   | tagcctgcagcctcacctat  | ctacgggctgtcttctcagg |
| Angptl6 | gccactacgacagcttctc   | gaggttagagtgggcacagg |
| Atf4    | tcgatgctctgtttcgaatg  | agaatgtaaagggggcaacc |
| Hsp60   | aaagatgggggtcactgttgc | catcacacctctccggattt |
| Hsp70   | tgctgatccaggtgtacgag  | cgttggtgatggtgatcttg |
| Hsp10   | ggcaggagggaaggaag     | cagttcacgtgacaccatt  |
| ClpP    | tgatcgagtcagcaatggag  | cccagcagaggaagtttcag |
| Chop    | cagaggtcacacgcacatcc  | ccttgctcttctctctctcc |
| Gadd45a | atggcatccgaatggaata   | ttctcgcagcttctctctc  |
| 18S     | cgcggttctattttgttggf  | agtcggcatcgtttatggtc |
| Acot2   | attgggctgcttgggatttc  | agcttccacgacatccaaga |
| Bcat2   | gcatctagtccagcgtcctc  | ccaaggttctcccttgaaca |
| Cebpb   | cgcaacacacgtgtaactgtc | cgaaacggaaaaggttctca |

## Supporting information Table 2

Primer sequences of the ChIP primers are as follows

| Primer          | Forward (5' - 3')     | Reverse (5' - 3')     |
|-----------------|-----------------------|-----------------------|
| <i>Fgf21</i>    | TGCTCAGGGTTCCTCCTAGA  | ACCAACCCCTGCTTAGCATT  |
| <i>Gadd34</i>   | GATGTTGGCGCAGATTGAGT  | GGACGCAATGTTTCACAGG   |
| <i>Atf3</i>     | ATTACGTCAGCCTGGGATTG  | CTCGCTGAGTGAGACTGTGG  |
| <i>Atf6</i>     | CTGGCTTTCCTCTCACCTTG  | TAGCAAACCAAGTGCAGCAG  |
| <i>Trib3</i>    | GGGCGGGTCACAGATGGTGC  | GACCGCCGCCAGCCTAACTG  |
| <i>Sestrin2</i> | CTCCTTGGGCTGTCACTCTC  | GTCCAATCAGCATCGACAAG  |
| <i>Cdsn</i>     | TTCTGGGTTAGGCAATGGAG  | AGTTGGTGTGGCAGGAGAAG  |
| <i>Bcat2</i>    | GTAAGGGGTGGAAGTCAAA   | GGAACGCACAACAGTAAACG  |
| <i>IL6 exon</i> | TTCCATCCAGTTGCCTTCTTG | AGGTCTGTTGGGAGTGGTATC |
